# Supplementary material for: The Effect of Sows’ and Piglets’ Behaviour on Piglet Crushing Patterns in Two Different Farrowing Pen Systems
Source: MDPI journal article supplement (doi:10.3390/ani9080538), 2019-08-07
Supplement: s1 [file s1]

**Table S1.** Ethogram of the recorded sow behavior during 72 hours postpartum and during piglet crushing.

|                                        |                                                             |                                                                                                                                                                       |
|----------------------------------------|-------------------------------------------------------------|-----------------------------------------------------------------------------------------------------------------------------------------------------------------------|
| body posture                           | standing                                                    | sow solely touches the ground with three or four limbs (except snout)                                                                                                 |
|                                        | sitting                                                     | weight-bearing of the forelimbs, but not of the hind limbs. Ham touches ground.                                                                                       |
|                                        | sternal recumbency                                          | sow touches the ground with the belly side/underside of the body, but not with her body sides. No weight-bearing of any limb.                                         |
|                                        | lateral recumbency                                          | sow touches the ground with the whole of one body side, not weight-bearing of any limb and at least three limbs are next to the body of the sow.                      |
| body posture changes (piglet crushing) | lay down in sternal recumbency                              | physiological and controlled lying down from a standing or sitting position in sternal recumbency                                                                     |
|                                        | lay down in lateral recumbency                              | physiological and controlled lying down from a standing or sitting position in sternal recumbency, followed by an immediate change from sternal to lateral recumbency |
|                                        | “flopping” in lateral recumbency                            | uncontrolled fall down of the sow from a standing or sitting position in lateral recumbency                                                                           |
|                                        | lateral recumbency to sternal recumbency                    | transition from lateral recumbency to sternal recumbency                                                                                                              |
|                                        | sternal recumbency to lateral recumbency (central position) | transition from a central sternal recumbency to lateral recumbency                                                                                                    |
|                                        | sternal recumbency to lateral recumbency (same side)        | transition from an asymmetric sternal recumbency (a distinction can be made between udder side and back side) to lateral recumbency in direction of the back side     |
|                                        | sternal recumbency to lateral recumbency (swap side)        | transition from an asymmetric sternal recumbency (a distinction can be made between udder side and back side) to lateral recumbency in direction of the udder side    |
|                                        | sternal recumbency to sternal recumbency                    | position correction without changing the body posture sternal recumbency                                                                                              |

**Table S2.** Ethogram of the recorded piglet behavior in the first 72 hours postpartum and during piglet crushing.

|                                                 |                     |                                                                            |
|-------------------------------------------------|---------------------|----------------------------------------------------------------------------|
| location                                        | creep area          | $\geq 50\%$ of the litter in the creep area                                |
|                                                 | pen                 | $> 50\%$ of the litter in the pen                                          |
| active / inactive                               | active              | $> 50\%$ of the piglets in the pen are active (standing, sitting, sucking) |
|                                                 | inactive            | $\geq 50\%$ of piglets in the pen are inactive (lying, except sucking)     |
| resting behavior next to the sow during rolling | no resting behavior | no piglets rest next to sow`s body immediate to the rolling event          |
|                                                 | resting behavior    | one or more piglets rest next to sow`s body immediate to the rolling event |
